# Supplementary material for: Lymphatic Valve Dysfunction in Western Diet-Fed Mice: New Insights Into Obesity-Induced Lymphedema
Source: Front Pharmacol. 2022 Mar 4;13:823266. doi: 10.3389/fphar.2022.823266 (PMC8931217; doi:10.3389/fphar.2022.823266)
Supplement: Supplementary file 2 [file Table1.XLSX]

## Sheet: Figure 1
	Figure 1A						Figure 1B																	Figure 1C				Figure 1D				Figure 1E
		Body Weight (gr)						Body Weight Gain - Control Diet (CD)								Body Weight Gain - Western Diet (WD)									Non-Fasted Plasma Glucose Concentration (mg/dL)				Non-Fasted Plasma Triglycerides Concentration (mg/dL)				Non-Fasted Plasma Triglycerides Total Cholesterol (mg/dL)
		Control Diet (CD)		Western Diet (WD)			Mouse	M1	M2	M3	M4	M5	M6		Mouse	M1	M2	M3	M4	M5	M6	M7		Mouse	CD	WD		Mouse	CD	WD		Mouse	CD	WD
	Mouse	Initial	Final	Initial	Final		Initial	0	0	0	0	0	0		Initial	0	0	0	0	0	0	0		M1	214.5	436.3		M1	51.1	77.7		M1	69	135.8
	M1	23.1	31.2	20.2	38.8		Week 1	1.2	2.1	1.1	1.1	2.3	2.2		Week 1	3.7	3	3.1	2.4	2.2	2.2	1.4		M2	225.4	545.4		M2	90.3	81.3		M2	88.3	124.4
	M2	19.3	32	16.7	30		Week 2	2.5	3.4	2.5	2.1	3.3	3.6		Week 2	5.5	4.8	5.2	3.8	3.7	4.4	2.5		M3	253.7	326.1		M3	83.9	45.9		M3	60.2	117.7
	M3	21.6	31.3	19.6	41.9		Week 3	3.4	5.4	2.8	3	4.3	5		Week 3	7.7	5.5	8.1	5.1	5.2	6.5	4.1		M4	239.5	347.1		M4	53.1	51.6		M4	72	142.1
	M4	20.3	29.3	16.7	35.5		Week 4	4.4	6.6	4.6	3.5	5.1	5.8		Week 4	9.6	6.7	10.1	6.5	6.6	8.3	5.6		M5	255.9	441.9		M5	70.2	60.3		M5	112.5	165.2
	M5	18.8	27.2	16.9	34.3		Week 5	4.8	7	5.2	4.2	6	6.8		Week 5	11	8	12.1	7.9	7.5	10.4	7		M6	299.6	379.4		M6	50.1	63.1		M6		158.4
	M6	16.7	26.9	18.8	43.1		Week 6	5.5	7.9	5.9	5.3	6.3	7.4		Week 6	13	9.4	14.3	8.9	9.3	12.9	7.4		M7		447.6		M7		92.1		M7		92.2
	M7			17.8	34.9		Week 7	5.8	8.6	6	5.5	6.7	7.3		Week 7	13.3	10	15.3	11	11.4	13.4	9.4
							Week 8	6.6	9.4	7.2	6.2	6.8	7.8		Week 8	13.9	10.6	15	12.5	12.1	15.7	10.3
							Week 9	7.2	10.2	8.1	7.1	7	8.4		Week 9	14.5	11.1	16.2	13.2	13.9	17.4	11.2
							Week 10	8	10.8	8.3	8.3	8.1	9.3		Week 10	15	11.7	17.5	14	14.4	19.3	12.8
							Week 11	8.2	10.9	7.5	8.5	8.5	10.4		Week 11	16.1	12.8	19.8	15.8	14.7	20.6	14.1
							Week 12	8.6	11.5	8.6	8.2	8.4	10.1		Week 12	17	13.1	20.6	17.1	16.3	22.3	14.6
							Week 13	9	12.1	9.1	8.7	8.5	10		Week 13	17.4	13	20.8	17.5	17.1	23.9	15.7
							Week 14	8.1	12.7	9.7	9	8.4	10.2		Week 14	18.6	13.3	22.3	18.8	17.4	24.3	17.1

## Sheet: Figure 2
	Figure 2C,D						Figure 2E
		Pressure Back-leak (cmH2O)						Valve Gating: Adverse Pressure Gradient Required to Close a Valve (cmH2O)
		Popliteal		Mesenteric				CD	WD	CD	WD	CD	WD	CD	WD	CD	WD
	Valve	CD	WD	CD	WD		Valve	0.2 cmH2O		0.5 cmH2O		1 cmH2O		2 cmH2O		3 cmH2O
	1	0.0905	0.1525	0.265667	0.377333		1	1	0.7	0.9	0.7	0.8	1.1	1.4	3	1.7	3.8
	2	0.0695	0.188	0.313333	1.212		2	0.8	0.7	0.7	0.9	0.7	2.1	0.9	2.8	0.9	2.9
	3	0.0405	0.025	0.143333	0.7		3	0.4	3.7	0.4	4.1	0.8	4.3	1.5	4.6	1.7	4.7
	4	0.0625	0.0135	0.043	0.05		4	0.4	0.5	0.4	0.7	0.5	3.9	0.4	4.4	0.6	4.5
	5	0.054	0.045	0.138	1.18333		5	0.6	18.4	0.6	19.1	1	19.1	1.8	19.7	1.8	19.6
	6	0.0835	0.007	0.17	0.09		6	0.6	0.6	0.7	0.6	1.1	0.9	1.6	2.7	1.7	3.4
	7	0.0345	0.0255	0.042	0.924667		7	3.6	1	4.2	1.3	4	5.4	4	5.8	4	5.8
	8	0.0325	0.049	0.026	0.138		8	0.4	0.5	0.4	3.8	0.7	3.8	1.8	3.7	2.1	4.1
	9	0.2195	0.0695	0.0653333	1.78333		9	0.3	8.8	0.4	9.5	0.4	10.2	0.4	11.5	0.6	12.4
	10	0.2425	0.07	0.3065	0.186		10	0.4	6.7	0.5	8	0.5	8.5	0.6	7.6	0.7	7.2
	11		0.0936667	0.0166667	0.85		11	0.3	20	0.4	20	0.5	20	0.6	20	0.6	20
	12		0.369		0.565		12		1.7		3.3		3.8		4.7		5.2
	13		0.0696667		0.236		13		5		7.5		7.5		7.8		8
	14		0.006		0.2475		14		1		1.5		1.5		1.7		1.8
	15				1.8255		15		1.1		1.8		1.8		1.8		1.7
	16				0.4725		16		1		1.1		1.2		1.2		1.2

## Sheet: Figure 3
	Figure 3B			Figure 3C			Figure 3D
	Valve Leaflet Length (um)			Valve Length (um)				Lymphatic Vessel Inner Diameter (um)												Lymphatic Vessel Inner Diameter (um)												Lymphatic Vessel Inner Diameter (um)																	Lymphatic Vessel Inner Diameter (um)
	CD	WD		CD	WD			CD: Mid-Lymphangion												CD: Sinus												WD: Mid-Lymphangion																	WD: Sinus
	109.331	101.949		178.084	178.794		Pressure (cmH2O)	Vessel 1	Vessel 2	Vessel 3	Vessel 4	Vessel 5	Vessel 6	Vessel 7	Vessel 8	Vessel 9	Vessel 10	Vessel 11		Vessel 1	Vessel 2	Vessel 3	Vessel 4	Vessel 5	Vessel 6	Vessel 7	Vessel 8	Vessel 9	Vessel 10	Vessel 11		Vessel 1	Vessel 2	Vessel 3	Vessel 4	Vessel 5	Vessel 6	Vessel 7	Vessel 8	Vessel 9	Vessel 10	Vessel 11	Vessel 12	Vessel 13	Vessel 14	Vessel 15	Vessel 16		Vessel 1
	118.089	103.93		186.362	160.583		0.5	44.625	40.4	43.257	54.344	39.492	64.117	65.651	86.897	49.564	61.285	87.843		82.874	61.444	50.798	51.845	52.843	79.976	72.961	110.71	82.31	57.792	112.544		87.523	67.745	81.297	40.981	57.231	82.432	72.452	61.397	55.595	42.014	37.898	83.296	58.051	78.708	110.166	80.941		103.16
	118.107	92.946		170.989	186.125		1	45.906	41.559	43.738	55.803	42.656	65.12	66.298	88.557	50.761	62.836	89.276		85.167	65.137	53.51	55.347	54.251	82.851	74.978	114.245	84.607	59.615	115.904		87.824	69.518	84.918	41.454	58.138	84.912	74.612	62.357	56.466	42.656	38.723	84.406	58.955	81.262	112.778	84.267		110.771
	109.199	108.079		166.496	186.26		1.5	49.617	46.045	45.351	60.777	51.822	68.291	68.446	94.606	53.567	68.098	94.894		93.819	76.826	63.107	66.09	59.102	92.532	82.245	126.148	91.771	66.921	127.134		89.77	75.02	93.867	42.963	60.955	92.513	81.508	67.116	60.158	44.171	40.466	87.97	62.963	91.525	120.062	93.034		133.615
	117.438	84.2828		157.745	159.401		2	54.256	52.351	48.019	66.433	60.34	72.223	71.816	101.602	57.803	74.269	101.578		103.595	89.977	75.29	77.465	64.083	103.893	91.505	138.068	103.79	75.705	138.304		97.798	86.051	100.361	44.657	63.744	99.468	88.483	75.534	66.377	46.117	41.122	91.84	70.931	105.739	126.12	99.914		154.272
	123.773	112.372		184.233	185.653		2.5	59.011	57.74	50.368	70.006	64.481	75.203	75.353	105.736	63.55	79.172	105.897		109.557	98.348	83.211	85.019	67.443	111.799	97.98	143.655	115.917	81.427	143.697		109.626	101.397	101.094	45.864	65.65	102.983	93.039	85.473	72.796	48.424	41.396	93.968	82.653	116.333	127.933	100.777		162.09
	126.179	109.023		176.666	157.036		3	63.449	61.878	52.57	71.871	67.311	76.946	77.763	107.91	69.971	82.559	108.368		113.103	104.688	87.526	89.887	70.155	116.77	102.314	146.719	125.367	85.717	146.835		118.749	114.799	101.384	47.002	66.804	105.514	96.209	93.209	77.999	50.23	41.803	95.155	97.393	121.751	129.156	101.017		166.421
	103.198	104.952		162.948	135.988		3.5	65.61	65.109	54.126	72.963	69.041	77.831	79.757	109.274	76.339	84.873	109.234		114.891	108.586	89.971	92.901	71.682	120.034	104.789	148.941	132.11	89.022	148.803		123.111	122.213	101.912	48.534	67.425	107.067	98.884	97.363	82.868	51.479	43.356	95.947	109.16	124.012	130.478	101.841		169.282
	125.524	111.843		140.481	144.501		4	65.89	67.54	55.456	73.308	70.4	78.606	81.148	110.037	82.374	86.058	109.931		115.732	111.026	91.602	94.678	72.716	122.089	106.16	150.123	135.718	91.734	149.828		125.276	125.874	102.348	50.049	68.364	107.849	101.042	99.597	86.548	52.353	44.618	96.492	114.493	125.404	131.082	102.317		171.574
	107.651	114.07		176.261	162.002		4.5	66.448	69.005	57.021	73.731	71.461	79.547	81.926	110.546	87.522	86.184	110.797		116.713	112.374	92.853	96.205	73.644	123.404	107.496	150.739	137.952	93.73	149.923		126.383	127.971	102.35	51.332	69.699	108.378	102.497	101.131	88.762	53.062	45.033	96.782	116.284	125.859	131.082	102.32		173.177
	128.521	80.4538		160.79	149.704		5	67.234	70.614	57.672	74.503	72.369	80.742	82.44	111.185	91.67	86.672	111.691		117.443	113.368	93.422	97.536	74.338	124.428	108.783	151.24	139.366	95.745	150.495		126.567	129.111	102.35	52.538	69.985	109.406	104.329	101.817	90.068	53.908	45.62	97.164	117.429	126.303	131.339	102.32		174.034
		112.533			154.198		5.5	67.321	71.938	58.124	74.743	72.74	81.29	82.935	111.645	94.378	87.45	111.924		117.774	114.468	93.976	98.393	74.801	125.313	109.331	152.134	140.154	97.218	152.054		126.704	130.058	102.35	53.531	69.985	110.207	105.074	102.243	90.624	54.566	46.355	97.545	118.224	127.107	132.011	102.32		175.075
		75.4103			155.013		6	67.321	72.892	58.712	75.124	73.136	81.598	83.927	111.952	95.923	87.614	111.924		117.774	115.49	94.917	98.898	75.379	125.978	109.466	152.687	141.045	98.052	152.553		128.092	130.964	102.35	54.564	69.985	110.564	105.159	102.776	91.389	54.763	46.903	97.943	118.767	127.516	132.322	102.32		176.204
		93.7706			183.456		6.5	67.321	73.322	59.209	75.25	73.941	82.42	84.712	112.06	96.841	87.614	111.924		118.145	116.445	95.387	99.547	75.773	126.786	109.775	153.147	141.359	99.349	152.924		128.855	131.329	102.617	55.937	70.038	110.988	106.179	103.064	92.401	55.572	47.603	98.466	119.033	127.516	132.39	102.32		177.25
		91.2149			188.916		7	67.324	74.05	59.619	75.253	74.455	82.669	84.84	112.077	97.762	87.614	111.924		118.953	117.075	95.387	100.109	75.805	126.987	109.953	153.762	141.81	100.073	153.906		128.874	131.577	102.724	57.187	70.457	111.989	107.374	103.225	92.711	56.142	48.161	98.819	119.41	127.819	132.461	102.32		178.183
		108.508			186.34		7.5	68.112	74.799	60.551	75.588	74.703	82.669	84.84	112.209	98.422	87.614	112.099		119.12	117.5	95.473	100.265	75.827	127.576	110.081	153.869	143.113	100.328	154.135		128.874	131.854	102.724	57.837	70.949	112.562	107.755	103.418	92.714	56.465	48.986	99.012	119.638	128.386	132.667	102.32		178.372
							8	68.694	75.202	61.426	75.675	74.983	82.962	85.023	112.242	98.794	87.855	112.114		119.12	117.565	95.572	100.621	76.054	128.221	110.249	153.869	143.386	101.411	154.135		128.894	132.324	102.724	58.029	71.024	113.289	108.329	103.644	93.149	56.546	49.117	99.096	120.263	128.746	133.031	102.32		178.749
							8.5	68.718	75.51	61.697	75.675	75.289	83.256	85.431	112.535	99.551	88.493	112.114		119.12	117.97	95.812	100.826	76.25	129.158	110.342	153.869	143.585	102.26	154.135		129.18	132.651	102.724	58.065	71.1	113.936	108.514	103.644	93.753	56.752	49.348	99.268	120.879	128.784	133.24	102.32		179.046
							9	68.718	76.091	61.738	75.675	75.311	83.268	85.846	112.672	100.125	88.549	112.114		119.12	118.201	95.814	101.063	76.681	130.063	110.732	153.965	143.963	102.373	154.135		129.205	132.783	102.739	58.436	71.487	113.994	108.612	103.855	93.988	56.983	50.177	99.42	121.182	128.784	133.717	102.35		179.513
							9.5	68.718	76.734	61.755	75.835	75.553	83.268	86.201	112.824	100.129	88.549	112.114		119.12	118.591	96.092	101.331	77.041	130.278	111.544	154.018	144.118	102.373	154.135		129.205	132.856	103.18	58.911	71.948	114.261	109.308	103.926	94.251	57.239	50.88	99.703	121.274	128.784	133.76	103.233		180.445
							10	68.718	77.14	62.054	75.844	75.821	83.318	86.315	113.133	100.129	88.677	112.421		119.12	118.864	96.476	101.542	77.113	130.558	111.972	154.018	144.658	102.574	154.135		129.205	132.949	103.41	59.208	72.229	114.608	110.062	104	94.475	57.462	51.124	99.993	121.342	128.899	133.76	103.692		180.698
[truncated: 71 more columns]

## Sheet: Figure 4
Figure 4A
	Cross-Sectional Distensibility (1/cmH2O)
	Mid-Lymphangion		Sinus
Pressure (cmH2O)	Mean	SEM	Mean	SEM
0.5	0	0	0	0
1	0.0186296	0.00483875	0.0456667	0.00747322
1.5	0.0318889	0.00580533	0.0928889	0.0102108
2	0.0386667	0.00581799	0.120315	0.0113852
2.5	0.0421111	0.00659909	0.110111	0.0108256
3	0.0442963	0.00660545	0.0977407	0.0102473
3.5	0.0422222	0.00704712	0.0877037	0.0092402
4	0.0374074	0.00663653	0.0782222	0.00755273
4.5	0.0326667	0.00568098	0.0706296	0.00665472
5	0.0284815	0.00501603	0.064	0.00618126
5.5	0.0255926	0.00452037	0.0579259	0.00554775
6	0.0236296	0.00409716	0.0532963	0.00517082
6.5	0.0215185	0.00393515	0.0495185	0.00488394
7	0.0202593	0.00358161	0.0462222	0.00450335
7.5	0.0182222	0.00316333	0.0434815	0.0041679
8	0.0167037	0.00272051	0.0405926	0.003938
8.5	0.0158889	0.00241808	0.0382593	0.00372853
9	0.0154074	0.00218859	0.0364074	0.00350874
9.5	0.0150741	0.00221554	0.0342593	0.00329663
10	0.0142593	0.00219465	0.0325185	0.00312575

## Sheet: Figure 5
	Figure 6A						Figure 6B																	Figure 6C				Figure 6D				Figure 6E
		Body Weight (gr)						Body Weight Gain - PAI-1 KO Control Diet (CD)								Body Weight Gain - PAI-1 KO Western Diet (WD)									Non-Fasted Plasma Glucose Concentration (mg/dL)				Non-Fasted Plasma Triglycerides Concentration (mg/dL)				Non-Fasted Plasma Triglycerides Total Cholesterol (mg/dL)
		Control Diet (CD)		Western Diet (WD)			Mouse	M1	M2	M3	M4	M5			Mouse	M1	M2	M3	M4					Mouse	CD	WD		Mouse	CD	WD		Mouse	CD	WD
	Mouse	Initial	Final	Initial	Final		Initial	0	0	0	0	0			Initial	0	0	0	0					M1	207.4	213.8		M1	94	35.4		M1	61.8	59.6
	M1	20.6	30.3	16.1	31.2		Week 1	1.2	0.2	2.2	2.5	2.5			Week 1	4.4	3.2	1.3	2.8					M2	242.9	264.7		M2	61.4	45.3		M2	46	72.3
	M2	18.7	26.5	17.1	32.1		Week 2	2.2	1.2	2.9	3.6	3.7			Week 2	7	6.1	2.8	3.4					M3	281.4	271.7		M3	98.3	79.3		M3	58	82.8
	M3	16.1	25.1	20.6	34.2		Week 3	3.3	2.4	3.7	4.3	5.2			Week 3	8.5	8	5	5.3					M4	282	326.9		M4	72.5	92.1		M4	63.5	118.2
	M4	18.3	26.2	18.2	31.9		Week 4	3.9	3.1	3.9	4	5.6			Week 4	9.7	9.8	5.8	5.5					M5	307			M5	71.7			M5	82
	M5	19.4	29.4				Week 5	4.9	4.3	4.5	5.1	6.4			Week 5	10.8	11.1	7.2	6.7
							Week 6	5.4	4.7	5.7	4.3	6.9			Week 6	11.7	11.6	8	7.6
							Week 7	5.8	5.1	5.7	5.5	8.1			Week 7	12.2	12.1	8.7	8.4
							Week 8	6.2	5.7	6.7	5.8	8.3			Week 8	13.1	13.2	9.4	9.2
							Week 9	6.6	5.8	7.1	6.2	8.5			Week 9	13.4	13.2	9.5	9.9
							Week 10	7.1	6.1	7.7	6.8	8.6			Week 10	13.2	13.5	11.3	10.3
							Week 11	7.1	6.9	7.9	7	8.9			Week 11	13.9	13.8	11.6	11.5
							Week 12	7.6	7.3	8.3	7.3	9.3			Week 12	13.7	14	12.6	12.3
							Week 13	8.4	7.6	8.7	7.7	9.6			Week 13	14.4	14.3	12.9	12.9
							Week 14	9.7	7.8	9	7.9	10			Week 14	15.1	15	13.6	13.7

## Sheet: Figure 6
	Figure 7A				Figure 7B
		Pressure Back-leak (cmH2O)				Valve Gating: Adverse Pressure Gradient Required to Close a Valve (cmH2O)
		Mesenteric				CD	WD	CD	WD	CD	WD	CD	WD	CD	WD
	Valve	CD	WD		Valve	0.2 cmH2O		0.5 cmH2O		1 cmH2O		2 cmH2O		3 cmH2O
	1	0.026	0.135		1	0.3	0.1	0.3	0.3	0.5	1.9	1.2	2	1.4	2
	2	0.316667	0.00416667		2	0.2	0.2	0.3	0.3	0.6	0.9	1	2.2	1.1	2.5
	3	0.108333	0.0168333		3	0.4	0.2	0.5	0.2	0.8	0.8	1.8	2.3	2.1	2.6
	4	0.225	0.441667		4	0.1	0.6	0.2	1	0.4	2.5	1	3	1.2	3.5
	5	0.138	0.0483333		5	0.6	0.3	0.9	0.5	1.3	0.9	2	1.4	2.4	1.9
	6	0.015	0.5		6	0.4	1	0.6	1.5	0.9	3	1.4	3.5	1.9	4
	7	0.45	0.1		7	0.2	0.1	0.3	0.3	0.6	1.1	1	2	1.3	2
	8	0.01	0.0983333		8	0.1	0.2	0.2	0.3	0.5	0.6	0.9	1	1.1	1.4
	9	0.0108333			9	0.3		0.4		0.7		1		1.4
	10	0.0375			10	0.1		0.2		0.3		0.7		0.9
	11	0.306667			11	0.2		0.3		0.6		0.9		1
	12				12
	13				13
	14				14
	15				15
	16				16
